# Supplementary material
Source: Frontiers journal article supplement (https://www.frontiersin.org/articles/487771)
Supplement: Table_2.xls [file Table_2.xls]

## Sheet: Table 2
Supplementary Table 2. The differentially expressed lncRNAs.
lncRNA	logFC	logCPM	PValue	FDR
AC115619.1	-7.27241	-0.673142	3.57e-06	8.79e-06
AL121974.1	-5.13035	-0.265138	5.25e-05	0.000113137
AC012085.2	-5.07306	1.68874	6.2e-21	6.55e-20
LINC02490	-5.03847	0.279544	1.5e-29	3.52e-28
AC024651.1	-4.75254	-1.56779	6.15e-12	2.76e-11
LINC00682	-4.71976	-1.27641	3.75e-47	4.41e-45
CDKN2B-AS1	-4.66109	5.42915	6.69e-41	4.28e-39
LINC00974	-4.65437	0.57261	1.6e-58	4.06e-56
AC092652.2	-4.61943	-1.35078	5.41e-44	4.72e-42
HAND2-AS1	-4.49183	4.17239	3.01e-24	4.29e-23
AC005358.2	-4.48648	0.0905442	1.61e-55	3.1e-53
AC110813.1	-4.39209	0.199302	2.8e-19	2.53e-18
AC010776.2	-4.38775	-0.852602	4.69e-20	4.57e-19
ADAMTS9-AS1	-4.2776	2.26463	1.17e-24	1.74e-23
AC073283.2	-4.0886	-0.00453257	1.74e-61	6.04e-59
LINC00507	-4.05696	-0.943291	3.45e-37	1.55e-35
LINC02023	-4.0181	1.11927	2.23e-29	5.16e-28
LINC00955	-4.00386	0.312244	5.6e-15	3.38e-14
NKAIN3-IT1	-3.99633	0.472056	6.25e-27	1.17e-25
LINC02000	-3.91788	-0.810653	2.03e-37	9.46e-36
LINC02268	-3.77305	-1.5946	8.11e-18	6.33e-17
AC087379.2	-3.7665	-1.68784	1.81e-18	1.5e-17
AC092652.1	-3.74242	-1.66331	1.5e-29	3.52e-28
AL353801.1	-3.67384	-1.43516	3.99e-37	1.78e-35
AC104407.1	-3.65463	-1.04101	4.82e-16	3.18e-15
FRMD6-AS2	-3.58296	-1.67442	6.6e-21	6.94e-20
AP001627.1	-3.5359	0.415224	2.47e-21	2.71e-20
AC092723.1	-3.44767	1.00858	1.35e-28	2.95e-27
AL136537.2	-3.41633	-1.37883	3.54e-17	2.63e-16
AL513217.1	-3.40736	-1.41383	4e-15	2.44e-14
AC036108.3	-3.38307	1.85238	1.69e-22	2.03e-21
LINC00461	-3.37745	-1.17449	1.71e-23	2.28e-22
LINC01080	-3.37402	-1.60674	2.18e-25	3.5e-24
MIR133A1HG	-3.36442	-1.55112	6.21e-16	4.07e-15
AC079313.2	-3.36356	-0.580603	8.54e-10	3.09e-09
MIR1-1HG-AS1	-3.34756	1.42945	2.32e-20	2.31e-19
LINC01634	-3.34152	-1.74187	3.85e-17	2.85e-16
AC011306.1	-3.30743	-1.6749	2.88e-13	1.48e-12
LINC01954	-3.30037	-0.64305	3.44e-23	4.45e-22
AC093607.1	-3.25572	-1.27368	3.76e-19	3.35e-18
AC002398.2	-3.21493	-1.33015	5.62e-11	2.29e-10
ADAMTS9-AS2	-3.19952	0.672538	3.33e-27	6.42e-26
BVES-AS1	-3.19653	-0.673257	1.44e-16	1e-15
FOXD3-AS1	-3.18757	-0.638652	3.29e-21	3.56e-20
AC005180.1	-3.16208	-0.46157	1.69e-21	1.88e-20
AL355607.1	-3.1492	-1.71045	2.27e-09	7.83e-09
LINC01687	-3.1453	-0.318762	1.82e-15	1.14e-14
MIR3150BHG	-3.14137	0.595933	6.07e-23	7.65e-22
AP001554.1	-3.1363	0.721621	1.27e-22	1.55e-21
AC004947.1	-3.12648	-0.565133	5.23e-36	2.12e-34
AP001107.5	-3.12498	0.780868	3.94e-20	3.88e-19
UBXN10-AS1	-3.11583	1.36244	1.23e-16	8.66e-16
AC126178.1	-3.07512	-0.741455	2.36e-23	3.09e-22
AL132642.1	-3.0683	-0.749816	4.47e-28	9.24e-27
AC104024.1	-3.06661	-1.35554	1.73e-19	1.59e-18
AC106772.2	-3.049	-1.09075	2.02e-09	7.03e-09
SEMA6A-AS2	-2.98799	-1.66364	3.8e-39	2.06e-37
MEF2C-AS1	-2.97877	-0.0336954	3.31e-30	8.5e-29
LINC01829	-2.96988	-1.05428	3.8e-10	1.42e-09
AC005180.2	-2.95627	-0.0351603	1.77e-18	1.47e-17
LINC00891	-2.95432	-1.47821	7.26e-23	9.09e-22
CA3-AS1	-2.93766	1.26671	4.04e-25	6.3e-24
AC068189.1	-2.92249	-1.01727	1.35e-17	1.04e-16
CHL1-AS2	-2.86422	-1.66489	6.56e-22	7.54e-21
AC092834.1	-2.86212	-0.0131793	5.87e-11	2.39e-10
AC133644.2	-2.83442	-0.62517	3.39e-20	3.35e-19
AC009102.2	-2.83215	-0.944912	1.46e-12	6.97e-12
OSTN-AS1	-2.82997	-1.67937	7.84e-18	6.14e-17
LINC01537	-2.80267	-0.866603	3.64e-26	6.38e-25
AC011365.1	-2.79895	0.0659978	1.13e-23	1.53e-22
MBNL1-AS1	-2.77576	4.34573	3.27e-24	4.66e-23
LINC01055	-2.76891	-0.93892	4.23e-19	3.73e-18
LINC01013	-2.74295	-0.804131	6.11e-33	1.95e-31
AC021491.4	-2.72918	-0.0572232	9.23e-32	2.68e-30
AP002358.1	-2.71768	-1.45608	6.08e-15	3.66e-14
AF165147.1	-2.71385	-0.0757704	3.15e-28	6.63e-27
AL662860.1	-2.70804	-0.971328	6.32e-22	7.28e-21
AC004707.1	-2.70203	-0.557799	5.42e-30	1.35e-28
AC020779.2	-2.70201	-0.733295	1.53e-22	1.86e-21
CARMN	-2.68988	3.29677	8.41e-17	6e-16
RBMS3-AS3	-2.67725	-1.78539	3.87e-21	4.15e-20
CASC18	-2.6765	-0.786725	4.33e-16	2.87e-15
LINC00488	-2.65343	-1.378	9.8e-09	3.17e-08
JAZF1-AS1	-2.61219	-1.636	5.75e-14	3.15e-13
LINC02568	-2.60691	2.87735	2.03e-15	1.27e-14
AC068722.2	-2.60303	-1.03847	2.28e-20	2.28e-19
AC093627.6	-2.60282	-0.505597	2.84e-13	1.46e-12
LINC00092	-2.58777	0.13858	1.9e-41	1.29e-39
GAS1RR	-2.55796	-0.340027	1.26e-13	6.7e-13
AC110995.1	-2.53804	-0.491139	2.42e-20	2.41e-19
LINC01016	-2.53779	-1.58356	1.39e-26	2.53e-25
AL022318.1	-2.51916	-1.02833	2.52e-14	1.43e-13
AF001548.1	-2.5032	0.10135	1.17e-07	3.38e-07
LINC02185	-2.50007	-1.63767	4.9e-25	7.56e-24
AC020978.4	-2.49943	0.935697	1.76e-33	5.85e-32
LINC02033	-2.48665	-1.26718	1.99e-25	3.2e-24
AC113383.1	-2.48574	-0.05901	8.15e-33	2.58e-31
AC007495.1	-2.47593	-1.10847	8.16e-17	5.84e-16
AC134312.1	-2.47064	-0.941336	8.97e-20	8.51e-19
SFTA1P	-2.45958	-0.246714	1.05e-20	1.08e-19
LINC01644	-2.44445	-1.71924	2.25e-14	1.28e-13
AL596223.1	-2.4435	0.546935	2.48e-17	1.86e-16
AC004870.2	-2.43857	-1.51698	4.87e-17	3.57e-16
AC008609.1	-2.43579	-1.40778	0.000124776	0.00025731
AP000944.1	-2.43554	-1.71731	2.8e-14	1.58e-13
LINC00908	-2.43397	-1.23756	2.97e-28	6.25e-27
LINC01502	-2.41054	-1.69044	1.98e-05	4.49e-05
LINC02554	-2.40689	-1.74457	2.5e-13	1.29e-12
AC036108.2	-2.39972	-1.68492	1.51e-09	5.34e-09
LINC02441	-2.37701	3.19316	1.67e-20	1.69e-19
AC130371.2	-2.37115	0.368052	2.86e-32	8.78e-31
AC106869.1	-2.36426	2.53064	1.24e-35	4.9e-34
AL391807.1	-2.36247	-1.48873	8.43e-16	5.47e-15
LINC00484	-2.34776	-1.24239	1.58e-23	2.11e-22
AC103740.1	-2.34718	1.86068	5.7e-19	4.98e-18
AC011247.1	-2.33663	-0.923904	2e-10	7.69e-10
LINC01354	-2.33063	-0.928812	1.03e-16	7.28e-16
LINC01798	-2.33019	-1.59135	3.66e-13	1.86e-12
AF186192.1	-2.32595	-1.81411	7.6e-19	6.53e-18
LINC00582	-2.3114	-0.780022	1.54e-17	1.18e-16
AL365361.1	-2.28311	2.4828	2.33e-16	1.59e-15
LINC02408	-2.2702	-1.23723	1.94e-16	1.33e-15
AL034346.1	-2.26901	-0.977013	2.41e-22	2.88e-21
AC022893.2	-2.26896	-1.71411	4.12e-18	3.32e-17
LINC01781	-2.26429	-0.875053	1.68e-15	1.06e-14
MRGPRF-AS1	-2.25373	-1.3352	2.66e-11	1.13e-10
LINC00940	-2.24066	0.843893	2.09e-13	1.09e-12
DPP10-AS1	-2.23773	1.98861	2.28e-07	6.42e-07
ARHGEF26-AS1	-2.23589	-0.41536	2.12e-08	6.64e-08
BX664727.3	-2.23587	-1.74008	1.23e-15	7.86e-15
AC144831.1	-2.23534	1.49089	1.06e-28	2.33e-27
AC011472.4	-2.23232	-0.771926	2.82e-13	1.45e-12
AC015908.2	-2.22774	0.0184373	3.35e-20	3.32e-19
AC022034.1	-2.2262	2.00013	4.77e-17	3.5e-16
AC003991.1	-2.22227	0.323212	1.08e-17	8.35e-17
AC087277.2	-2.2152	-1.38144	1.7e-15	1.07e-14
FGF14-AS2	-2.21057	0.487864	4.53e-21	4.83e-20
GDNF-AS1	-2.20933	-1.13631	6.38e-12	2.86e-11
IL6R-AS1	-2.19361	-1.32972	1.82e-26	3.28e-25
AL391335.1	-2.18522	-1.72014	1.41e-06	3.65e-06
LINC01475	-2.18415	-0.59686	5.97e-18	4.73e-17
AC087482.1	-2.18306	-0.323014	2.67e-08	8.27e-08
AP003071.4	-2.15995	0.98372	4.68e-13	2.35e-12
LINC01624	-2.15694	-1.34167	3.86e-18	3.13e-17
LINC01352	-2.14144	-1.6634	1.48e-20	1.51e-19
AC009097.4	-2.13816	-1.64003	3.31e-10	1.25e-09
AL162424.1	-2.13237	-1.56655	6.28e-16	4.11e-15
TRPC7-AS1	-2.132	-0.0555073	6.2e-20	5.98e-19
AL359853.1	-2.10878	-1.72289	1.84e-14	1.05e-13
AC135012.3	-2.09624	0.954101	4.49e-21	4.79e-20
ERVH-1	-2.07994	-0.271358	1.79e-09	6.25e-09
AL160286.3	-2.07507	-1.79331	7.26e-11	2.92e-10
LINC00472	-2.05446	-1.37506	3.73e-14	2.07e-13
AC004990.1	-2.05412	0.930223	2.58e-16	1.75e-15
BX284668.2	-2.05056	-0.610618	8.65e-10	3.12e-09
AC083900.1	-2.04919	-0.541802	1.39e-13	7.33e-13
AC009549.1	-2.0485	-0.737667	3.26e-09	1.11e-08
LIFR-AS1	-2.04685	-0.510476	5.06e-13	2.53e-12
AL355102.4	-2.03443	-1.66081	1.6e-14	9.24e-14
AL136309.2	-2.02889	-0.935941	7.24e-24	9.98e-23
AP000866.2	-2.02781	1.81357	1.53e-21	1.71e-20
AC244021.1	-2.02579	-1.05784	1.57e-11	6.78e-11
AC024337.2	-2.01103	-1.5813	1.95e-14	1.11e-13
AF064860.2	-2.00825	-1.0552	3.29e-08	1.01e-07
TARID	-2.0001	0.141051	1.19e-24	1.77e-23
AC005674.1	-1.99763	-1.38918	9.13e-14	4.92e-13
AC016571.1	-1.98208	-0.851964	1.45e-06	3.73e-06
AC104072.1	-1.98034	-1.31309	1.79e-10	6.93e-10
AC120036.4	-1.97315	-1.34418	3.36e-11	1.4e-10
AL356270.1	-1.97235	-1.01109	2.23e-10	8.54e-10
AL133383.1	-1.95204	-0.861554	3.12e-12	1.45e-11
AL138995.1	-1.94491	-0.712031	5.22e-20	5.07e-19
THRB-AS1	-1.9378	-1.50679	5.43e-14	2.98e-13
AC009133.3	-1.93635	-0.470228	1.47e-10	5.74e-10
AC244205.1	-1.93473	-1.11012	1.72e-09	6.03e-09
LINC02038	-1.93249	2.25736	2.6e-24	3.73e-23
AL645568.1	-1.9305	0.824661	5.13e-34	1.78e-32
AC090164.3	-1.92627	-1.69317	8.62e-16	5.58e-15
AL512306.3	-1.92576	-1.69513	3.55e-10	1.34e-09
FENDRR	-1.91105	5.54314	9.1e-22	1.03e-20
AC011503.2	-1.899	-1.49946	6.33e-13	3.13e-12
AC015922.2	-1.89873	1.7542	1.76e-19	1.62e-18
AC015922.3	-1.89598	2.30816	5.41e-19	4.73e-18
AL031663.3	-1.89502	-1.79786	1.05e-06	2.74e-06
AC009336.1	-1.87608	-1.47074	2.48e-10	9.46e-10
AC004637.1	-1.87398	-1.7448	1.85e-06	4.71e-06
AP000911.1	-1.84829	-0.246647	2.76e-10	1.05e-09
AC103923.1	-1.838	-0.796094	2.25e-21	2.47e-20
AF111167.2	-1.81755	1.29071	3.07e-32	9.42e-31
AC005699.1	-1.80976	-1.21115	1.05e-10	4.15e-10
LINC02588	-1.80816	-0.0346211	3.33e-07	9.21e-07
AC023421.1	-1.80581	1.4808	0.00202298	0.00350328
AC026469.1	-1.80439	-1.44111	3.39e-14	1.89e-13
AC009163.5	-1.80102	-0.675874	9.92e-07	2.61e-06
AC025265.3	-1.78576	-1.04233	6.37e-10	2.33e-09
LINC00390	-1.7775	-1.66526	4.84e-09	1.61e-08
LINC02447	-1.77722	-0.476265	7.86e-17	5.63e-16
AF287957.1	-1.7727	-1.21933	2.5e-13	1.29e-12
LINC00964	-1.77213	-1.74067	1.03e-10	4.09e-10
ZNF571-AS1	-1.76677	-0.134335	7.19e-19	6.18e-18
LINC00689	-1.76216	-1.28549	1.95e-10	7.52e-10
AC093627.7	-1.75732	-1.53551	1.93e-09	6.71e-09
LINC01133	-1.74629	5.56929	1.83e-21	2.02e-20
MIR646HG	-1.74529	-1.41561	1.87e-11	8.01e-11
LINC02397	-1.74317	-0.526012	2.02e-07	5.71e-07
AC104819.3	-1.74012	-0.740909	1.94e-17	1.47e-16
AC107959.1	-1.7395	0.114973	3.82e-17	2.83e-16
AP001065.1	-1.73799	-0.534581	4.2e-11	1.73e-10
LINC01389	-1.73196	0.882107	6.96e-17	5.01e-16
LINC00330	-1.72987	-1.74101	0.00368175	0.00612332
AL513542.1	-1.72138	-1.79452	2.15e-11	9.21e-11
HNF4A-AS1	-1.70367	-0.959939	0.000374976	0.000722828
LINC02362	-1.69901	2.2665	1.33e-11	5.8e-11
AC010247.2	-1.69871	-0.842324	1.27e-11	5.56e-11
LINC02289	-1.69597	-1.69777	5.88e-11	2.39e-10
IL12A-AS1	-1.68858	-1.45459	5.44e-07	1.47e-06
LINC01783	-1.67952	-1.69644	2.9e-05	6.47e-05
AL512363.1	-1.67863	-0.0843782	2.83e-10	1.07e-09
MIR22HG	-1.67765	5.41117	7.66e-30	1.87e-28
AC023510.2	-1.6736	-1.72877	4.51e-08	1.36e-07
AC012640.3	-1.67105	-1.69362	3.41e-09	1.15e-08
AL135905.1	-1.6672	2.03401	5.46e-17	3.99e-16
AC079834.2	-1.66556	-0.760644	1.06e-11	4.65e-11
LINC01018	-1.65935	-0.405654	7.03e-05	0.000149178
AC020571.1	-1.6471	0.0336497	4.52e-12	2.05e-11
LINC00892	-1.64384	-0.381766	1.03e-13	5.52e-13
AL626787.1	-1.6408	-1.5357	1.22e-08	3.93e-08
A2M-AS1	-1.63796	0.716474	3.48e-12	1.6e-11
AC009159.3	-1.63785	-1.24883	2.55e-10	9.72e-10
LINC01293	-1.63735	-1.24051	0.000257672	0.000507131
AP001347.1	-1.63242	-0.832381	9.97e-08	2.91e-07
LINC01135	-1.62561	-0.899805	9.65e-19	8.22e-18
LINC01579	-1.62465	0.679577	1.52e-05	3.5e-05
AC018647.1	-1.61672	-1.44547	8.4e-09	2.73e-08
LINC01160	-1.61586	-0.880879	8.29e-07	2.2e-06
LINC01778	-1.61477	-0.788509	1.18e-05	2.74e-05
AC106881.1	-1.61464	-0.578369	5.64e-20	5.47e-19
LINC02541	-1.61323	-0.694896	6.06e-08	1.81e-07
AC093583.1	-1.61259	-1.82335	0.000689624	0.00127725
AC243960.1	-1.61236	0.744159	2.31e-11	9.83e-11
EPB41L4A-DT	-1.60737	0.173674	3.96e-19	3.51e-18
AL133467.1	-1.60648	-0.862206	6.79e-09	2.23e-08
IFNG-AS1	-1.60335	-0.849403	1.63e-05	3.75e-05
AC129507.1	-1.58079	-0.0886417	2.98e-11	1.26e-10
AL158837.1	-1.57618	-0.495818	1.3e-15	8.26e-15
ZNF582-AS1	-1.57058	0.268605	7.97e-13	3.9e-12
MRPS30-DT	-1.56702	-0.160885	6.54e-09	2.15e-08
USP30-AS1	-1.56065	2.14914	4.9e-11	2.01e-10
AC025580.1	-1.55372	4.11472	3.71e-09	1.25e-08
AC106882.1	-1.54902	-1.40869	4.46e-06	1.09e-05
AC079209.1	-1.54808	-1.53551	6.36e-12	2.85e-11
AF127936.1	-1.5412	-1.05448	3.19e-07	8.83e-07
FO393418.1	-1.54068	-1.70578	9.96e-12	4.4e-11
RFPL1S	-1.53704	-1.21416	3.13e-11	1.31e-10
LINC01081	-1.53658	-1.62344	5.87e-13	2.91e-12
ID2-AS1	-1.53318	1.39574	9.82e-10	3.53e-09
AC068594.1	-1.51876	-0.903211	5.14e-09	1.71e-08
ZNF790-AS1	-1.51719	-0.389233	2.56e-14	1.45e-13
AL512328.1	-1.5157	-0.126187	4.83e-07	1.31e-06
SERTAD4-AS1	-1.5142	1.93755	4.91e-09	1.64e-08
LINC00882	-1.5014	-1.40963	1.2e-06	3.12e-06
AP003559.1	1.50281	-0.386132	4.89e-09	1.63e-08
AC124067.3	1.50608	-1.40051	2.51e-05	5.64e-05
LINC00114	1.50639	0.790645	4.84e-08	1.46e-07
LINC01273	1.50938	-0.723219	7.54e-07	2.01e-06
CASC11	1.51519	-1.70611	7.07e-10	2.57e-09
LNCTAM34A	1.51874	-0.4544	1.93e-10	7.45e-10
LINC01232	1.52205	2.85567	4.53e-20	4.43e-19
AL009178.2	1.52531	0.980948	3.85e-11	1.6e-10
AC016773.1	1.53282	-0.0205838	1.58e-15	1e-14
AL691482.3	1.53608	2.4792	1.62e-11	7.01e-11
LINC00513	1.53668	1.91279	2.43e-07	6.81e-07
AC025857.2	1.53796	0.181353	7.43e-15	4.43e-14
AP003555.2	1.54034	-1.24233	1.05e-06	2.76e-06
AL139384.1	1.54086	1.3059	1.22e-12	5.88e-12
AC073333.1	1.5587	-1.42771	2.52e-12	1.17e-11
AC084125.4	1.56689	-0.902537	5.94e-10	2.18e-09
UBE2R2-AS1	1.56716	-1.16532	1.36e-07	3.92e-07
AC106886.2	1.5676	-0.794763	7.32e-13	3.6e-12
AJ239328.1	1.57587	-1.49271	3.8e-07	1.04e-06
AL035446.1	1.57595	-0.33807	5.2e-05	0.000112096
AC073611.1	1.57813	-0.00325275	2.53e-24	3.64e-23
AL133330.1	1.5805	-1.38079	1.06e-09	3.8e-09
AC067945.3	1.58933	-1.87015	7.56e-05	0.000159584
AC016831.4	1.59596	-1.25419	4.04e-06	9.9e-06
MALAT1	1.59995	7.95994	3.29e-11	1.38e-10
AC116351.2	1.60335	-0.891419	6.8e-10	2.48e-09
AL096828.3	1.6142	-1.64816	1.11e-10	4.4e-10
LINC00525	1.61945	-0.236202	7.1e-08	2.1e-07
LINC00239	1.61964	1.55975	1.47e-10	5.76e-10
AC007342.4	1.62362	1.26089	8.51e-13	4.15e-12
LINC01270	1.62985	-0.596838	2.15e-11	9.17e-11
LMCD1-AS1	1.63007	-0.784123	1.78e-12	8.4e-12
AC016735.1	1.63156	0.837381	1.53e-12	7.26e-12
AC084859.1	1.63347	-1.44074	4.21e-07	1.15e-06
AC009041.2	1.63474	2.33912	9.21e-08	2.7e-07
AL139349.1	1.63952	-0.423577	1e-10	3.99e-10
AP006284.1	1.64225	1.18142	3.14e-11	1.32e-10
AC148476.1	1.64359	-0.96045	6.68e-11	2.7e-10
AC132872.2	1.65716	-1.54414	7.35e-13	3.61e-12
AC092535.4	1.66346	0.256446	3.32e-16	2.22e-15
AL136988.2	1.66353	-1.5726	1.36e-07	3.89e-07
AC129492.1	1.66427	0.350059	2.63e-07	7.34e-07
KIF25-AS1	1.66524	-1.0518	0.000647191	0.00120456
AC022075.1	1.6668	1.88967	1.99e-10	7.65e-10
AC010973.2	1.66724	0.371528	1.99e-17	1.51e-16
AC007773.1	1.6731	-0.576776	7e-13	3.44e-12
AC005775.1	1.67355	-1.63007	8.84e-11	3.53e-10
SLC16A1-AS1	1.67905	2.07374	9.68e-23	1.19e-21
AL359232.1	1.69235	-0.671687	8.83e-21	9.17e-20
KCNQ1OT1	1.69559	2.93543	2.57e-17	1.93e-16
AC006206.2	1.69847	-0.838634	0.000708334	0.00131015
AC005381.1	1.69993	-0.663379	1.94e-05	4.41e-05
C5orf66	1.70559	1.5746	3.78e-20	3.73e-19
LINC01703	1.71314	-0.0932213	3.38e-20	3.35e-19
AC099518.1	1.72722	-1.46388	1.98e-08	6.22e-08
AL021392.1	1.72949	-1.464	2.1e-13	1.09e-12
AP001160.1	1.73039	-0.581963	1.4e-20	1.43e-19
LINC02413	1.73118	-1.37041	1.44e-06	3.72e-06
ATP2A1-AS1	1.73207	-0.112981	1.48e-16	1.03e-15
ARLNC1	1.73721	-0.66096	9.66e-06	2.27e-05
LINC01311	1.74545	0.539483	2.82e-25	4.46e-24
AL354993.1	1.74574	-0.862015	3.82e-08	1.16e-07
AL139089.1	1.75367	0.6175	5.74e-18	4.55e-17
AL031595.3	1.76367	-0.0736547	3.18e-09	1.08e-08
PRMT5-AS1	1.77647	-0.625163	2.45e-17	1.84e-16
U91319.1	1.78107	-1.71627	0.000158191	0.000321591
AL590438.1	1.78608	0.932298	1.34e-10	5.27e-10
KCNK15-AS1	1.78978	-1.20282	2.49e-06	6.24e-06
AL354993.2	1.79278	-1.08054	2.49e-08	7.74e-08
LINC00624	1.80232	-0.021169	2.85e-08	8.8e-08
SCARNA9	1.80638	-0.512289	2.47e-10	9.42e-10
AC137630.3	1.80695	-1.20221	1.73e-08	5.48e-08
LINC01426	1.80747	-0.34896	4.42e-11	1.82e-10
AP003555.3	1.80824	-1.39816	1.1e-05	2.59e-05
CD44-AS1	1.81141	-1.09312	8.28e-11	3.32e-10
AL033527.3	1.82493	-1.04421	1.65e-15	1.04e-14
AC008763.1	1.83031	-1.44477	4.88e-10	1.8e-09
AL137060.1	1.83581	-0.872647	3.4e-18	2.77e-17
AC009121.1	1.84187	-1.2409	5.34e-14	2.93e-13
AL356417.2	1.85662	-1.77088	3.06e-09	1.04e-08
AC092614.1	1.86595	-0.855318	1.94e-18	1.61e-17
ZFAS1	1.87252	7.37239	7.15e-30	1.77e-28
C9orf163	1.89484	-0.208036	4.45e-25	6.91e-24
SNHG4	1.90106	2.87697	1.38e-23	1.86e-22
AC138150.2	1.91354	-0.252473	1.11e-15	7.13e-15
LINC02487	1.93039	1.81801	7.49e-16	4.87e-15
SNHG15	1.9324	5.11284	1.05e-42	7.93e-41
AC005725.1	1.93381	-0.883323	2.47e-05	5.55e-05
LINC01301	1.94388	0.868461	1.48e-10	5.77e-10
RHPN1-AS1	1.95786	0.793387	4.49e-18	3.61e-17
LINC01186	1.96964	-1.29501	1.46e-13	7.68e-13
TMEM147-AS1	1.97142	3.72482	4.56e-40	2.68e-38
AC007405.1	1.97207	-1.11985	3.5e-14	1.94e-13
TUSC8	1.98081	2.34556	4.59e-15	2.79e-14
AC025244.1	1.9834	-1.67251	0.00045594	0.000870025
AC134312.5	1.98481	-0.974665	6.58e-11	2.66e-10
PCAT1	1.98751	-1.56879	4.43e-13	2.23e-12
MCF2L-AS1	2.00448	2.96694	3.45e-19	3.08e-18
DLGAP1-AS2	2.01414	3.30676	1.21e-27	2.43e-26
AC108474.1	2.0173	-1.44601	0.000203872	0.000407549
AL596223.2	2.02425	-1.65702	9.49e-09	3.08e-08
AC136475.5	2.02669	-1.24679	1.96e-10	7.55e-10
LINC01484	2.03582	-1.77848	9.81e-13	4.76e-12
AC114296.1	2.05008	-1.11785	2.16e-07	6.11e-07
AL161630.1	2.06461	-0.901221	3.34e-07	9.24e-07
AC010280.1	2.06601	-1.52517	2.47e-07	6.93e-07
MNX1-AS1	2.07167	2.37666	9.94e-36	3.97e-34
PROX1-AS1	2.086	0.745359	2.41e-18	1.99e-17
MELTF-AS1	2.10068	1.62278	1.83e-33	6.07e-32
SLC7A11-AS1	2.10337	-1.64333	1.22e-08	3.91e-08
AC105429.1	2.11336	-0.340804	1.85e-18	1.54e-17
AL121832.3	2.12507	1.99628	5.09e-22	5.92e-21
AP001453.2	2.13544	1.16509	9.77e-26	1.64e-24
AC026704.1	2.14188	-0.854648	2.26e-17	1.7e-16
AC079089.1	2.14913	-0.709453	1.32e-15	8.39e-15
AC103706.1	2.15264	-0.738291	1.7e-16	1.17e-15
AC010719.1	2.15851	1.317	2.62e-22	3.11e-21
AC026368.1	2.16521	-1.58827	1.8e-14	1.04e-13
ABALON	2.18119	0.861521	3.73e-30	9.55e-29
AC069222.1	2.18669	-1.25006	2.65e-17	1.99e-16
CYP4A22-AS1	2.19204	-1.43232	3.77e-19	3.35e-18
AC067930.5	2.19627	-0.606789	7.14e-13	3.51e-12
AL136418.1	2.20617	-0.638943	1.43e-11	6.2e-11
MIR4713HG	2.21079	-1.29889	9.09e-17	6.46e-16
AC011700.1	2.21196	-1.18821	1.06e-15	6.76e-15
LINCR-0001	2.2198	-0.473546	1.04e-08	3.35e-08
BX470102.1	2.23655	1.36249	2.83e-24	4.05e-23
DKFZP434K028	2.23749	-1.62879	1.09e-08	3.51e-08
AC093904.4	2.24432	-0.636465	4.34e-09	1.46e-08
AC100803.3	2.25635	-0.806711	1.39e-09	4.94e-09
DLEU7-AS1	2.27143	-1.53924	1.64e-16	1.13e-15
AC090673.1	2.27428	-0.658096	8.62e-15	5.12e-14
AC126773.2	2.28613	-1.14757	2.57e-23	3.36e-22
AC105219.3	2.31825	-0.632486	1.01e-27	2.04e-26
AC010913.1	2.32881	-1.29828	4.92e-19	4.32e-18
LEF1-AS1	2.34361	-1.25825	3.12e-26	5.5e-25
LMO7-AS1	2.34777	-1.56335	8.15e-15	4.85e-14
SPATA3-AS1	2.35247	0.0855791	1.16e-20	1.19e-19
AC106900.2	2.3659	-0.779544	7.94e-22	9.05e-21
AC243967.2	2.37325	-1.34064	3.38e-10	1.28e-09
ZFPM2-AS1	2.39987	-0.967185	2.15e-09	7.47e-09
FOXP4-AS1	2.40512	1.42723	1.09e-43	8.91e-42
AC083809.1	2.41383	-0.769366	7.53e-12	3.35e-11
AC138904.1	2.42043	0.156255	2.08e-18	1.72e-17
AL365356.5	2.45014	-1.80602	1.22e-11	5.36e-11
AL390729.1	2.45728	-0.617309	2.52e-19	2.29e-18
LUCAT1	2.46135	-1.14646	2.89e-11	1.22e-10
AL035458.2	2.47545	-1.02282	1.14e-20	1.18e-19
AP001043.1	2.47754	2.46997	2.63e-14	1.49e-13
AC098864.1	2.48717	-1.05442	2.92e-08	8.99e-08
H19	2.49482	4.4198	3.78e-13	1.92e-12
AP006621.1	2.53339	-0.536602	2.84e-13	1.46e-12
AC092198.1	2.5434	-1.76057	9.98e-09	3.23e-08
SLC12A5-AS1	2.55664	-1.21798	5.05e-12	2.28e-11
AC021218.1	2.55789	4.56459	7.24e-14	3.93e-13
RAET1E-AS1	2.56358	-1.13172	8.44e-12	3.75e-11
AC007406.3	2.56833	-1.28738	2.52e-19	2.29e-18
AC004231.1	2.57066	-1.57093	7.97e-11	3.2e-10
AL078587.1	2.58703	-1.26242	3.34e-15	2.05e-14
LINC01146	2.59687	-0.768811	1.7e-12	8.04e-12
AC108134.3	2.60057	1.75729	5e-18	3.99e-17
VPS9D1-AS1	2.60851	3.80577	7.49e-52	1.14e-49
AC007608.1	2.62649	-0.569696	6.5e-13	3.21e-12
AP000785.1	2.6288	-1.63742	3.59e-08	1.1e-07
AL121899.1	2.63563	-0.751426	2.54e-21	2.77e-20
LINC01836	2.66851	-0.553256	5.05e-25	7.76e-24
LINC01356	2.67047	0.180515	1.87e-36	7.88e-35
AC026369.2	2.71165	-0.79777	1.05e-29	2.55e-28
LINC01730	2.7291	-1.3198	2.16e-18	1.79e-17
AC141930.1	2.75202	-1.67993	1.29e-11	5.63e-11
LINC01555	2.7552	-0.165739	9.52e-19	8.11e-18
LINC01348	2.76569	1.08108	1.78e-14	1.02e-13
AC005307.1	2.76968	-0.839088	9.06e-07	2.39e-06
MIR31HG	2.77005	-1.77124	5e-05	0.000108102
LINC01833	2.77338	-0.944028	1.74e-08	5.5e-08
AC131532.1	2.78316	-1.76418	5.97e-07	1.6e-06
AL354719.2	2.78979	-0.91544	1.05e-11	4.62e-11
AC110285.6	2.79705	-0.870791	2.4e-17	1.81e-16
AL356299.2	2.80208	-0.940367	1.15e-24	1.72e-23
POU6F2-AS2	2.85389	-1.54827	2.35e-06	5.92e-06
MIR503HG	2.85967	0.366855	1.32e-29	3.13e-28
AC104958.2	2.87605	2.34227	2.44e-37	1.11e-35
AL121761.1	2.8776	1.30926	3.42e-13	1.74e-12
ZDHHC20-IT1	2.88366	-1.22004	3.22e-14	1.8e-13
AC078860.1	2.93106	-1.29985	6.39e-23	8.03e-22
AC108676.1	2.96592	0.147064	2.01e-12	9.47e-12
LINC02320	2.97607	-0.772504	2.83e-22	3.35e-21
VAC14-AS1	2.97862	-0.684468	6.81e-26	1.15e-24
WASIR2	2.98588	-1.78885	3.21e-13	1.64e-12
DDN-AS1	3.00903	0.158162	4.14e-33	1.34e-31
AC009093.1	3.01017	-0.429007	1.27e-20	1.3e-19
EMX2OS	3.04738	1.34146	3.56e-07	9.79e-07
AC107959.3	3.05217	-0.739661	5.61e-29	1.26e-27
AC006329.1	3.05748	2.61446	1.51e-39	8.43e-38
AC091182.2	3.0782	-1.28716	5.94e-22	6.88e-21
GATA2-AS1	3.08346	2.29163	2.69e-27	5.25e-26
AC003965.2	3.1184	-1.48178	2e-19	1.83e-18
UNC5B-AS1	3.15369	0.16714	3.86e-13	1.96e-12
AC073283.1	3.15529	-1.00608	3.12e-25	4.9e-24
SPRY4-AS1	3.17462	-1.10681	4.76e-30	1.2e-28
DUXAP8	3.18064	0.456126	9.99e-18	7.74e-17
AC064807.2	3.21599	-1.30125	3.45e-15	2.11e-14
AC125603.2	3.22399	-0.537895	7.46e-16	4.86e-15
AL391056.1	3.2438	1.55489	4.13e-30	1.05e-28
LINC01485	3.26196	-0.855483	1.5e-15	9.47e-15
AC019155.3	3.26482	-2.05247	2.67e-05	5.97e-05
LINC02432	3.28759	-0.197251	7.51e-09	2.45e-08
LINC02081	3.29284	-0.887775	1.66e-23	2.21e-22
AC116345.1	3.35222	0.00899366	2.25e-12	1.05e-11
AC120498.4	3.36074	-1.77042	5.97e-12	2.68e-11
TSPEAR-AS2	3.39915	0.408566	5.47e-18	4.36e-17
LINC00221	3.40425	-1.44599	1.1e-05	2.59e-05
LINC01615	3.40451	-1.44768	2.09e-27	4.13e-26
ERICH3-AS1	3.42946	-2.12787	2.28e-06	5.76e-06
HSD52	3.44891	-0.748362	4.52e-12	2.05e-11
LINC01978	3.45503	1.41202	7.61e-32	2.22e-30
AP005233.2	3.51531	-0.330399	7.26e-30	1.79e-28
AC124067.2	3.5276	1.64276	1.64e-37	7.76e-36
UCA1	3.5326	4.33235	4.34e-19	3.83e-18
FAM222A-AS1	3.57801	0.130991	9.5e-41	5.95e-39
AC099792.1	3.5996	-0.440683	4.16e-20	4.08e-19
LINC01198	3.60494	-1.09085	6.95e-07	1.86e-06
AC008514.1	3.60848	-1.2489	2.11e-11	9.04e-11
DLGAP1-AS5	3.61083	-1.49238	1.19e-08	3.82e-08
PLAC4	3.6755	0.478341	4.28e-27	8.17e-26
DLX6-AS1	3.69894	0.152846	2.67e-13	1.38e-12
AC018553.1	3.75799	-1.16693	1.44e-11	6.27e-11
AC144450.1	3.77598	-1.63751	6.54e-17	4.72e-16
AC124319.1	3.77671	0.0755525	1.29e-21	1.43e-20
LINC01819	3.78668	3.18215	4.08e-11	1.69e-10
LINC00393	3.81001	-1.33689	6.66e-11	2.69e-10
SLCO4A1-AS1	3.81397	3.4985	7.68e-36	3.09e-34
LINC02544	3.82519	-1.9028	3.4e-14	1.9e-13
MYCNOS	3.83123	-0.981902	6.29e-11	2.55e-10
GACAT3	3.84879	-1.46488	1.61e-09	5.69e-09
MRPL23-AS1	3.88795	-1.4863	2.59e-11	1.1e-10
PURPL	3.93753	-0.376651	8.75e-12	3.88e-11
AL590004.3	3.93999	-0.614338	5.72e-17	4.17e-16
LINC01748	3.94178	1.06358	2.72e-29	6.23e-28
LINC00958	3.95446	-0.290913	1.32e-12	6.34e-12
AL033397.1	3.97739	-0.538296	9.63e-14	5.17e-13
AP005230.1	3.97879	-1.68641	1.46e-23	1.96e-22
AC078993.1	3.97967	1.31987	2.89e-17	2.16e-16
HOTAIR	4.01064	0.148205	5.18e-08	1.55e-07
LINC02563	4.02503	-1.68923	8.1e-14	4.39e-13
KCNMB2-AS1	4.04483	-0.0968235	3.63e-18	2.95e-17
AC092112.1	4.0572	-1.11111	2.6e-12	1.21e-11
IGFBP7-AS1	4.06913	-0.141104	6.17e-14	3.37e-13
AL590483.1	4.1193	-1.35332	1.37e-32	4.22e-31
AC090709.1	4.14874	-0.863695	3.81e-14	2.11e-13
AC100791.2	4.16591	-1.70235	1.07e-22	1.32e-21
ST8SIA6-AS1	4.20964	0.290517	5.67e-12	2.55e-11
AP005271.1	4.22067	-1.56859	5.89e-16	3.87e-15
AC020659.1	4.24641	1.28193	1.44e-26	2.62e-25
C17orf77	4.25601	1.57807	5.04e-17	3.69e-16
LINC01606	4.27086	-1.99701	1.28e-08	4.1e-08
AC110285.3	4.28757	-1.45932	1.01e-14	5.96e-14
CASC19	4.3024	-0.0405173	4.34e-40	2.56e-38
MAP3K20-AS1	4.34322	1.85406	1.04e-21	1.18e-20
AL109615.3	4.37609	0.637354	7.98e-45	7.48e-43
AC104024.2	4.4483	-1.28299	6.37e-23	8.02e-22
LINC01977	4.44921	0.0844987	2.8e-34	9.99e-33
LINC01594	4.50882	-0.905927	2.49e-22	2.97e-21
AF127577.3	4.51655	-1.18518	5e-14	2.74e-13
AC020907.1	4.57563	-0.720723	3.09e-14	1.73e-13
AC007128.1	4.69105	-0.088291	1.93e-43	1.54e-41
EVX1-AS	4.724	-0.61512	2.69e-15	1.66e-14
AL121832.1	4.74417	1.02277	2.35e-31	6.57e-30
LINC00616	4.76734	-1.8341	1.82e-08	5.76e-08
AL391845.2	4.78172	-1.41804	2.86e-41	1.92e-39
AC078923.1	4.86995	-1.57547	7.41e-30	1.82e-28
AC007128.2	4.87873	-1.55531	9.61e-39	5.01e-37
BBOX1-AS1	4.96907	1.52944	1.89e-45	1.9e-43
CRAT37	4.99694	-0.830105	4.93e-15	2.99e-14
DSCR8	5.00491	-2.08983	4.4e-09	1.48e-08
AC004080.1	5.0361	-1.13491	6.5e-16	4.25e-15
LINC01511	5.11118	-1.47512	1.31e-20	1.34e-19
AP000851.1	5.20106	-1.13294	2.04e-19	1.87e-18
FIRRE	5.20753	0.294802	6.43e-45	6.07e-43
PLUT	5.26362	-0.763287	5.4e-44	4.72e-42
AC093895.1	5.27566	-1.79048	1.45e-14	8.45e-14
ELFN1-AS1	5.28689	3.34456	9.58e-83	9.95e-80
BLACAT1	5.31105	2.37592	3.03e-56	5.9e-54
AC239584.1	5.35903	-1.4785	1.07e-19	1.01e-18
AL161431.1	5.39328	2.60198	2.2e-27	4.32e-26
NPSR1-AS1	5.41266	-1.05409	2.82e-24	4.04e-23
LINC01996	5.41974	-0.673941	2.6e-23	3.4e-22
LINC01811	5.53356	-1.08875	4.11e-38	2.04e-36
SNHG25	5.68317	3.64361	7.78e-32	2.26e-30
LINC02253	5.74838	1.32526	4.9e-26	8.46e-25
AC025154.2	5.88085	-0.540075	2.27e-21	2.49e-20
LINC00858	5.93617	0.510573	3.77e-35	1.44e-33
AC007277.1	5.95634	1.11848	5.54e-22	6.43e-21
AL162582.1	5.99667	-0.324148	2.74e-27	5.33e-26
AC123023.1	6.07906	-0.00115918	4.93e-46	5.3e-44
AC117386.2	6.16348	-1.07505	4.1e-32	1.24e-30
AC106875.1	6.18141	-1.48662	1.43e-11	6.22e-11
IGFL2-AS1	6.24537	0.334378	4.61e-23	5.87e-22
AC005256.1	6.25505	-1.15272	5.58e-27	1.06e-25
LINC01602	6.29456	-1.28833	3.55e-23	4.58e-22
AC079466.1	6.30968	-1.04332	1.3e-16	9.1e-16
LINC00659	6.31152	0.642048	7.94e-49	1.03e-46
AC097478.1	6.31799	1.14575	2.83e-18	2.33e-17
AL162413.1	6.44297	-1.4702	9.21e-26	1.55e-24
LINC01705	6.61438	-0.824353	2.97e-45	2.89e-43
AC111149.2	6.63711	-1.41683	2.57e-15	1.59e-14
ERVMER61-1	6.66975	-1.10443	2.2e-16	1.5e-15
AC003958.2	6.81941	-1.53066	3.94e-19	3.5e-18
LINC02577	6.89033	1.05653	3.03e-50	4.39e-48
LINC00460	6.98954	1.00859	1.47e-41	1.02e-39
LINC01411	7.13495	1.27708	1.19e-23	1.61e-22
LINC02163	7.18738	-0.667985	3.23e-59	8.57e-57
AC007099.1	7.35104	-0.269938	1.3e-42	9.66e-41
AC009055.2	7.46448	-0.94909	3.1e-14	1.74e-13
AC055717.2	7.71997	-0.195155	2.73e-51	4e-49
TMEM132D-AS1	7.79543	-0.208188	2.77e-15	1.71e-14
LINC01234	7.84573	2.19236	2.2e-38	1.11e-36
AC073365.1	7.96771	-0.245302	6.53e-22	7.51e-21
FEZF1-AS1	8.83132	2.07873	1.11e-37	5.32e-36
